# Supplementary figures and images for: Potential neoplastic evolution of Vero cells: in vivo and in vitro characterization
Source: Springer Nature journal article supplement (doi:10.1007/s10616-017-0082-7), 2017-04-06

p139 Vero cells

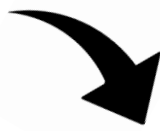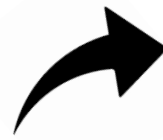

Vero-transformed colonies (TCs)

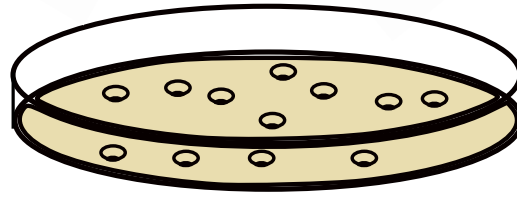

with serum cultures

serum-free cultures

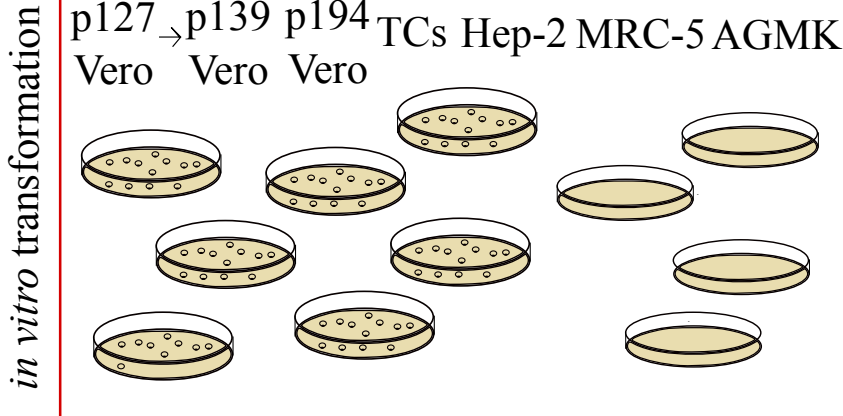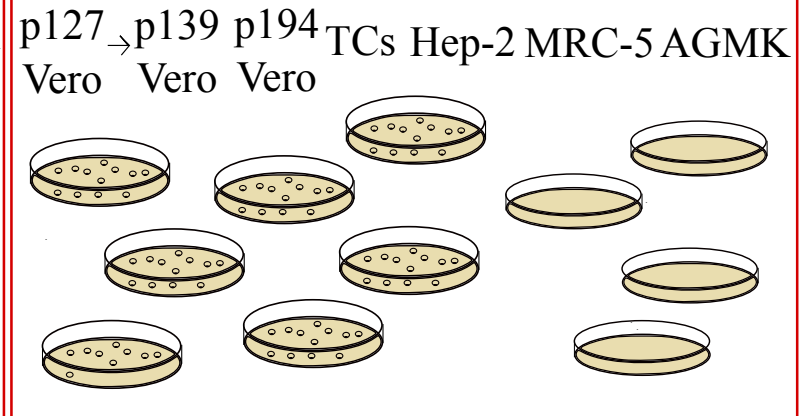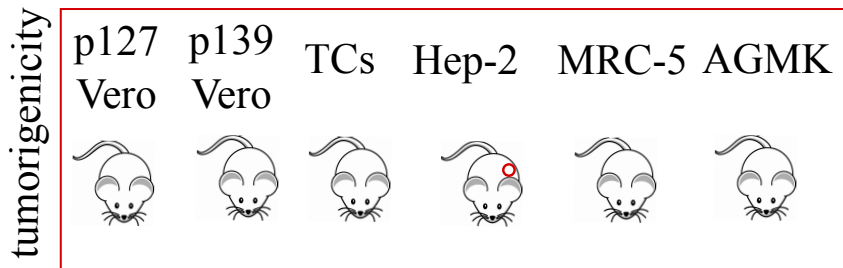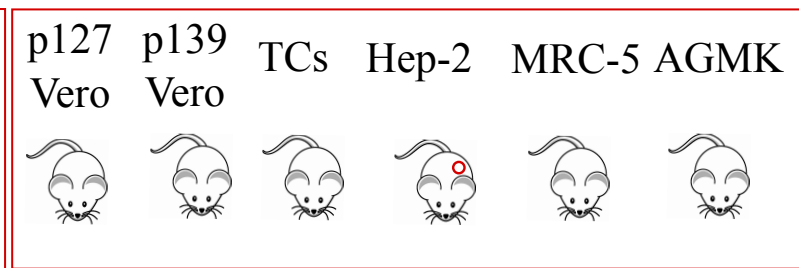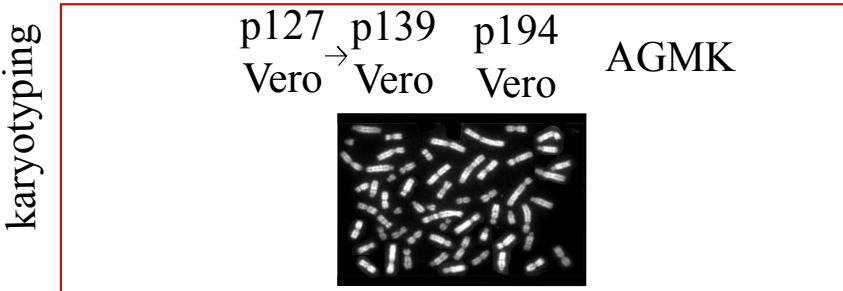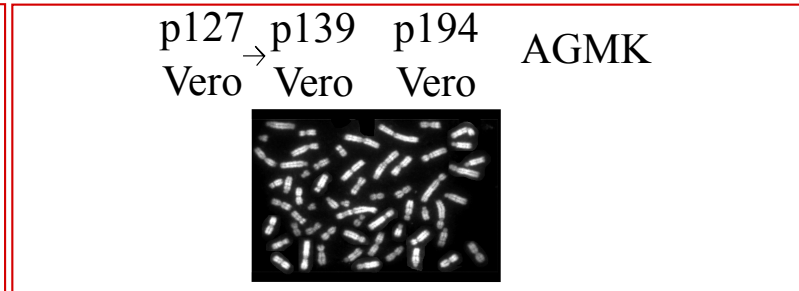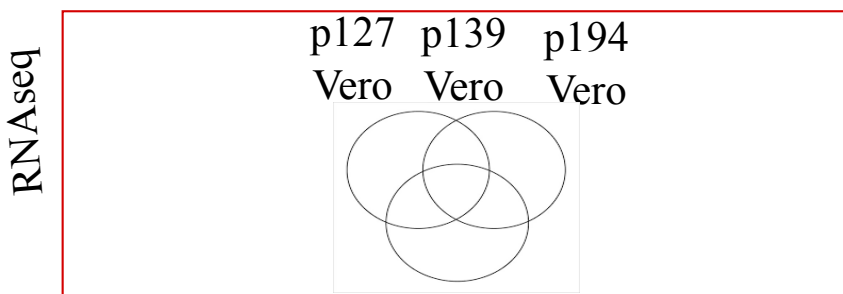

Supplement: 10616_2017_82_MOESM1_ESM.pdf [file 10616_2017_82_MOESM1_ESM.pdf]
